---

# nAdder: A scale-space approach for the 3D analysis of neuronal traces

---

Minh Son Phan<sup>1</sup>, Katherine Matho<sup>2</sup>, Emmanuel Beaurepaire<sup>1</sup>, Jean Livet<sup>2</sup>, and Anatole Chessel<sup>1</sup>

<sup>1</sup>Laboratory for Optics and Biosciences, CNRS, INSERM, Ecole Polytechnique, IP Paris, Palaiseau, France

<sup>2</sup>Sorbonne Université, INSERM, CNRS, Institut de la Vision, 17 rue Moreau, F-75012 Paris, France

December 4, 2020

## ABSTRACT

Tridimensional microscopy and algorithms for automated segmentation and tracing are revolutionizing neuroscience through the generation of growing libraries of neuron reconstructions. Innovative computational methods are needed to analyze these neural traces. In particular, means to analyse the geometric properties of traced neurites along their trajectory have been lacking. Here, we propose a local tridimensional (3D) scale metric derived from differential geometry, which is the distance in micrometers along which a curve is fully 3D as opposed to being embedded in a 2D plane or 1D line. We apply this metric to various neuronal traces ranging from single neurons to whole brain data. By providing a local readout of the geometric complexity, it offers a new mean of describing and comparing axonal and dendritic arbors from individual neurons or the behavior of axonal projections in different brain regions. This broadly applicable approach termed nAdder is available through the GeNePy3D open-source Python quantitative geometry library.

**Keywords** Computational neuroanatomy · connectomics · 3D neuronal reconstructions · axonal and dendritic arbors · scale space · quantitative geometry · Python

## 1 Introduction

Throughout the history of the field of neuroscience, the analysis of single neuronal morphologies has played a major role in the classification of neuron types and the study of their function and development. The NeuroMorpho.Org database (Ascoli, 2006; Ascoli et al., 2007), which collects and indexes neuronal tracing data, currently hosts more than one hundred thousand arbors of diverse neurons from various animal species. Technological advances in large-scale electron (Helmstaedter et al., 2013; Kasthuri et al., 2015; Motta et al., 2019) and fluorescence microscopy (Gong et al., 2013; Winnubst et al., 2019; Abdeladim et al., 2019; Wang et al., 2019; Muñoz-Castañeda et al., 2020) facilitate the exploration of increasingly large volumes of brain tissue with ever improving resolution and contrast. These tridimensional (3D) imaging approaches are giving rise to a variety of model-centered trace sharing efforts such as the MouseLight (<http://mouselight.janelia.org/>, Winnubst et al., 2019), Zebrafish brain atlas (<https://fishatlas.neuro.mpg.de/>, Kunst et al., 2019) and drosophila connectome projects (<https://neuprint.janelia.org/>, Xu et al., 2020), among others.

nAdder: A scale-space approach for the 3D analysis of neuronal traces

---

26 Crucially, the coming of age of computer vision through advances in deep learning is offering ways to automate the  
27 extraction of neurite traces (Magliaro et al., 2019; Januszewski et al., 2018; Radojević & Meijering, 2019), a process  
28 both extremely tedious and time consuming when performed manually. This is currently resulting in a considerable  
29 increase in the amount of 3D neuron reconstructions from diverse species, brain regions, developmental stages and  
30 experimental conditions, holding the key to address multiple neuroscience questions (Meinertzhagen, 2018). Methods  
31 from quantitative and computational geometry will play a major role in handling and analyzing this growing body  
32 of neuronal reconstruction data in its full 3D complexity, a requisite to efficiently and accurately link the anatomy  
33 of neurons with varied aspects such as their function, development, and pathological or experimental alteration.  
34 Furthermore, morphological information is of crucial importance to address the issue of neuronal cell type classification,  
35 in complement to molecular data (Bates et al., 2019; Adkins et al., 2020).

36 An array of geometric algorithmic methods and associated software has already been developed to process neuronal  
37 reconstructions (Bates et al., 2020; Cuntz et al., 2010; Arshadi et al., 2020). Morphological features enabling the  
38 construction of neuron ontologies, described for instance by the Petilla convention (Petilla Interneuron Nomenclature  
39 Group et al., 2008), have been used for machine learning-based automated neuronal classification (Mihaljević et al.,  
40 2018). These features have also been exploited to address more targeted questions, such as comparing neuronal arbors  
41 across different experimental conditions in order to study the mechanisms controlling their geometry (Santos et al.,  
42 2018). In the context of large-scale traces across entire brain structures or the whole brain, morphological measurements  
43 are employed for an expanding range of purposes, e.g. to proofread reconstructions (Schneider-Mizell et al., 2016),  
44 probe changes in neuronal structure and connectivity during development (Gerhard et al., 2017) or identify new neuron  
45 subtypes (Wang et al., 2019).

46 So far however, metrics classically used to study neuronal traces tend to rely on elementary parameters such as length,  
47 direction and branching; as such, they do not enable to finely characterize and analyze neurite trajectories. One  
48 particularly interesting parameter that characterizes neurite traces is their local geometrical complexity, i.e. whether they  
49 adopt a straight or convoluted path at a given point along their trajectory. This parameter is of particular relevance for  
50 circuit studies, as it is tightly linked to axons' and dendrites' assembly and their role in information processing: indeed,  
51 axons typically follow simple paths within tracts while adopting a more complex structure at the level of terminal arbor  
52 branches that form synapses. Moreover, the sculpting of axonal arbors by branch elimination during circuit maturation  
53 can result in convoluted paths (Keller-Peck et al., 2001; Lu et al., 2009). The complexity of a neurite segment thus  
54 informs both on its function and developmental history. Available metrics such as tortuosity (the ratio of curvilinear to  
55 Euclidean distance along the path of a neurite) are generally global and average out local characteristics; moreover,  
56 traces from different neuronal types, brain regions or species can span vastly different volumes and exhibit curvature  
57 motifs over a variety of scales, making it difficult to choose which scale is most relevant for the analysis. One would  
58 therefore benefit from a generic method enabling to analyze the geometrical complexity of neuronal trajectories 1)  
59 locally, i.e. at each point of a trace, and 2) across a range of scales rather than at a single, arbitrary scale.

60 Methods based on differential geometry have been very successfully applied in pattern recognition and classic computer  
61 vision (Sapiro, 2006; Cao, 2003). In particular, the concept of scale-space has led to thorough theoretical developments  
62 and practical applications. The key idea is that starting from an original signal (an image, a curve, a time series, etc.),  
63 one can derive a family of signals that estimate that original signal as viewed at various spatial or temporal scales. This  
64 enables to select and focus the analysis on a specific scale of interest, or to remove noise or a low frequency background  
65 signal; in addition, scale-space analysis also provides multi-scale descriptions (Lindeberg, 1990). On 2D curves, the  
66 mean curvature motion is a well-defined and broadly applied scale-space computation algorithm (Cao, 2003). So far,  
67 however, comparatively little has been proposed concerning 3D curves, such data being less common (Digne et al.,  
68 2011). Applications of curvature and torsion scale-space analyses for 3D curves have been reported (Mokhtarian, 1988)  
69 but remain few and preliminary; the inherent mathematical difficulty represents another reason for this gap. Neuronal  
70 trace analysis clearly provides an incentive for further investigation of the issue.

71 Here, we present a complete framework for scale-space analysis of 3D curves and applied it to neuronal arbors. This  
72 method, which we name *nAdder* for Neurite Analysis through Dimensional Decomposition in Elementary Regions,  
73 allows us to compute the local 3D scale along a curve, which is the size in micrometers of its 3D structure, i.e. the size  
74 at which the curve locally requires the three dimensions of space to be described. This scale is quite small for a very  
75 straight trace, and larger when the trace displays a complex and convoluted pattern over longer distances. We propose  
76 examples and applications on several published neuronal trace datasets that demonstrate the interest of this metric to  
77 compare the arbors of individual neurons, extract morphological features reflecting local changes in neurite behavior,  
78 and provide a novel region-level descriptor to enrich whole brain analyses. Implementation of the *nAdder* algorithms  
79 along with an array of geometry routines and functions are made available in the recently published GeNePy3D Python  
80 library (Phan & Chessel, 2020), available at <https://genepy3d.gitlab.io>. Code to reproduce all figures in this study,  
81 exemplifying its use, is available at <https://gitlab.com/msphan/multiscale-intrinsic-dim>.

## 82 2 Results

83 We introduce a new form of analysis to investigate the spatial complexity of neuronal arbors. Our approach consists of  
84 decomposing each branch of a neuronal arbor into a sequence of curve fragments which are each assigned an intrinsic  
85 dimensionality, i.e. the smallest number of dimensions that accurately describes them, from which we compute a local  
86 3D scale, defined as the highest scale at which the curve locally has a 3D intrinsic dimensionality. The first sub-section  
87 of the Results details the principle underlying this approach. We next demonstrate its purpose, accuracy and relevance  
88 through several applications.

### 89 2.1 Computation of the local 3D scale of neuronal traces from their multiscale intrinsic dimensionality

90 Given a neuronal arbor, we decompose each of its branches into a sequence of local curved fragments, which are  
91 classified according to their intrinsic dimensionality, defined by combining computations of both curvature and torsion  
92 of the curves. Briefly, a portion of curve with low torsion and curvature would be considered a 1D line, one with high  
93 curvature but low torsion would be approximately embedded within a 2D plane, and a curve with high torsion could only  
94 be described by taking into account the three spatial dimensions. This results in a hierarchical decomposition, capturing  
95 the fact that a 1D line is basically embedded in a 2D plane (Figure 1A, S1). To validate the proposed decomposition,  
96 we applied it on simulated traces presenting different noise levels. Our algorithm reached accuracies above 90% with  
97 respect to the known dimensionality of the simulations at low noise level and still above 80% at high noise level, while  
98 an approach not based on space-scale which we took as baseline (Yang et al., 2016; Ma et al., 2017) was strongly  
99 affected by noise (Figure 1A, S2 and S3; details on the simulation of traces, noise levels and algorithm are available in  
100 the Methods section).

101 Our proposed decomposition of traces according to their local intrinsic dimensionality depends on the scale at which the  
102 analysis is performed. To develop a metric based on this decomposition that would be robust to scale, we implemented  
103 a space-scale approach. The notion of scale can be abstractly interpreted as the level of detail that an observer takes  
104 into account when considering an object, varying from a high level (when observing a trace up close i.e. at smaller  
105 scales), to low level (when observing it from afar i.e. at larger scales). A scale-space is the computation of all versions  
106 of a given curve across spatial scales. Several mathematical and computational frameworks have been proposed to  
107 compute such ensemble of curves; the simplest one used here consists of smoothing the initial portion of trace analyzed  
108 by convolutions of its coordinates with Gaussian kernels. The dimensionality of such a curve element, as we analyze it  
109 at increasing scales, is typically best described as 3D at the smallest scales (i.e. taking in account a high level of detail),  
110 and becomes 2D or 1D at larger scales (i.e. low level of detail) as more and more details are smoothed out (Figure 1B,  
111 middle panel and S4). Here, in the context of neuronal arbors, scales are measured in micrometers, by computing the  
112 radius of curvature of the smallest detail kept at that scale (see methods for details).

## *nAdder*: A scale-space approach for the 3D analysis of neuronal traces

---

113 To make use of the local dimensionality decomposition across multiple scales and compute a simpler and more intuitive  
114 metric, we define the local 3D scale as the highest scale at which the trace still remains 3D. The trace will then locally  
115 transform to 2D or 1D for scales higher than that local 3D scale. An example of local 3D scale calculation is shown  
116 in Figure 1B. This computation is done at the level of curves; to apply it to whole neuronal arbors, we decompose  
117 the arbor into curves by considering, for each ‘leaf’ (terminals), the curves that link it to the root (i.e. the cell body),  
118 averaging values when needed (Figure S5). The result is an algorithm that computes a local 3D scale metric for full  
119 neuronal arbors, which we term *nAdder* (see Methods for more details on the algorithm).

120 To test our approach, we examined the local 3D scales of different types of neurons presenting dissimilar arbor shapes,  
121 using traces from the NeuroMorpho.Org database (Figure 1C). We first studied a mouse striatal D2-type medium spiny  
122 neuron reconstructed by Li et al. (2019) presenting a relatively simple structure with only a few dendrites (Figure  
123 1C1, Movie S1). Computation of the local 3D scale for this neuron revealed variations in spatial structure across local  
124 regions. For instance, regions (i) and (ii) in Figure 1C1 correspond to two branch segments located at different distances  
125 from the soma, and the straightest segment (i) transforms from 3D to 2D and then 1D at a scale smaller than the more  
126 tortuous portion (ii). This results in a lower local 3D scale in region (i) ( $\sim 40 \mu\text{m}$ ) compared to region (ii) ( $\sim 100 \mu\text{m}$ ).

127 We then focused on a mouse cerebellar Purkinje neuron from Chen et al. (2013), presenting a more complex dendritic  
128 arbor (Figure 1C2, Movie S2). Most of this arbor was characterized by low local 3D scales ( $\sim 45 \mu\text{m}$  on average), in  
129 accordance with the fact that Purkinje cells dendritic arbors have a nearly flat appearance, and hence transform quickly  
130 to a 2D plane when scanning the scale space. Nevertheless, the analysis revealed one region (iii) presenting local 3D  
131 scales higher than the mean value, which was linked to the fact that dendrites in this region protruded in an unusual  
132 manner out of the main plane of the arbor (see Movie S2).

133 Finally, we examined the reconstruction of a mouse retinal ganglion cell (Badea & Nathans, 2011) comprising its entire  
134 dendritic arbor and the portion of its axon enclosed in the retina (Figure 1C3, Movie S3). We observed small local  
135 3D scales ( $\sim 35 \mu\text{m}$ ) along most of the axonal trajectory (see region (iv) in 1C3) except in its most proximal portion  
136 characterized by high local 3D scales ( $\sim 150 \mu\text{m}$ , region (v)). This reflects the structure of the axon as it first courses  
137 in a tortuous manner towards the inner side of the retina before running more directly towards the optic nerve head,  
138 the exit point for ganglion cell axons leaving the retina. The proximal region of the axon thus converts from 3D to 2D  
139 and 1D much faster than the more distal portion. The dendritic arbor presented an intermediate local 3D scale on the  
140 whole ( $\sim 80 \mu\text{m}$ ) but with strong local variations. This corresponded to the fact that some dendritic branches exhibited  
141 complex shapes whereas others were more direct, as can be seen in Movies S2 and S3.

142 We also compared our local 3D scale metric with two classic local descriptors of 3D traces, curvature and torsion  
143 (Figure S6). Mapping of the three parameters in the Purkinje neuron presented in Figure 1C2 showed that the local  
144 3D scale provided the most informative measure of the geometric complexity of neuronal arbors, whereas curvature  
145 and torsion yielded representations that were difficult to interpret as they were highly discontinuous because of local  
146 variations of the curves.

147 Overall, the local 3D scale metric computed with *nAdder* offers a new local measure of the geometric complexity of  
148 neuronal traces, and provides information robust across neuron types, shapes and sizes. We subsequently used our  
149 algorithm to reanalyze published datasets in order to explore its capacity to extract biologically meaningful anatomical  
150 insights.

## 151 **2.2 Application of *nAdder* to characterize neuronal arbors during growth and in experimentally altered** 152 **condition**

153 To evaluate the relevance and usefulness of the local 3D scale measure, we first applied *nAdder* to compare neuronal  
154 arbors at different stages of their development and in normal vs. experimentally altered contexts. We selected data from  
155 Santos et al. (2018) hosted in the NeuroMorpho.Org database which describe the expansion of the dendritic arbors

nAdder: A scale-space approach for the 3D analysis of neuronal traces

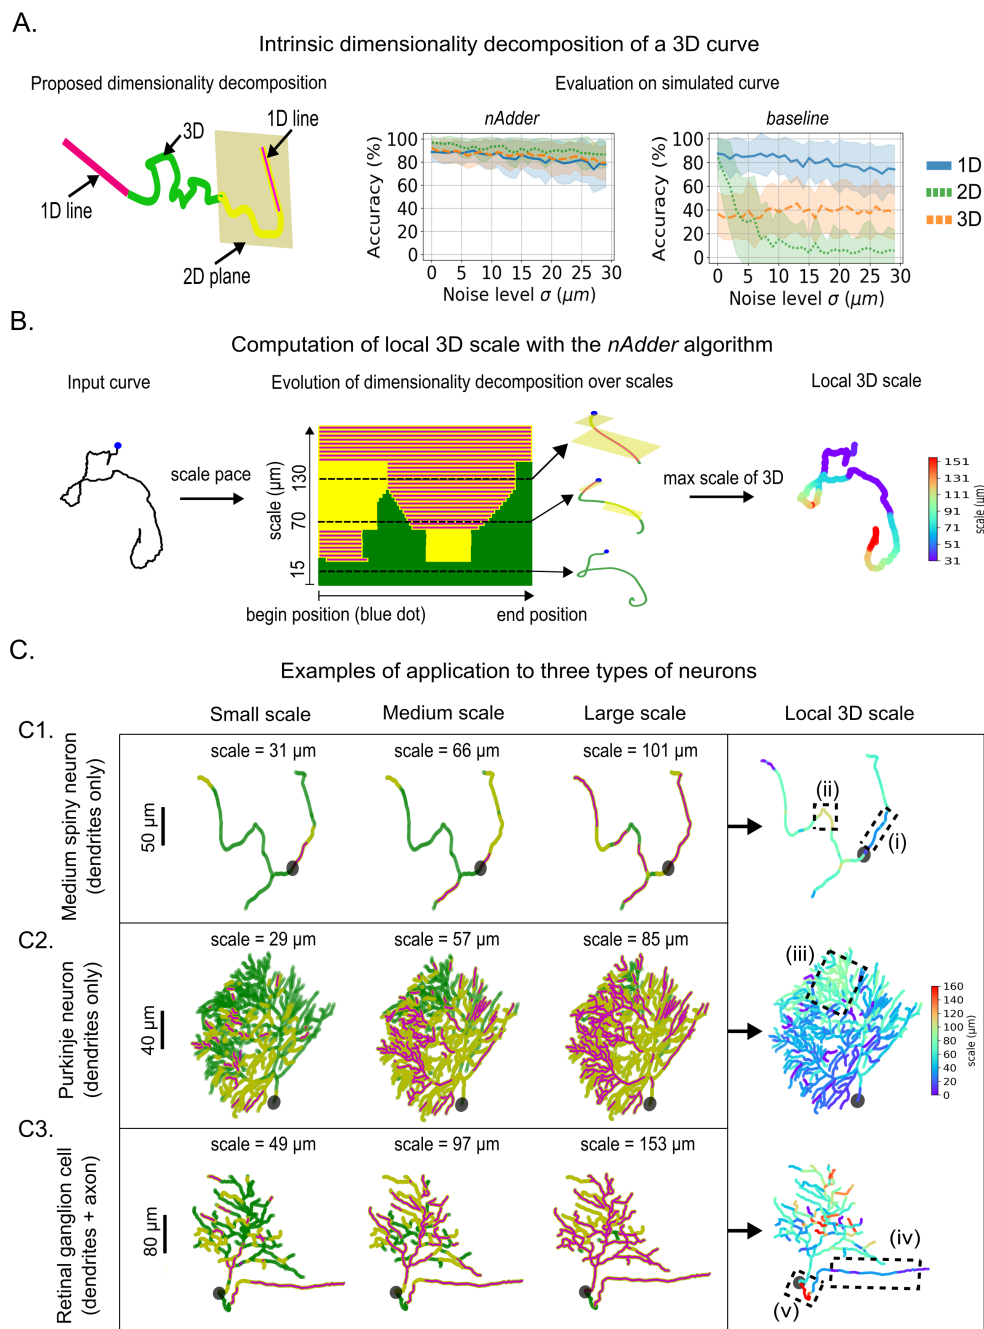

Figure 1: **Computation of the 3D local scale of neuronal traces from their multiscale dimensionality decomposition.** (A) (left) Variation of the intrinsic dimensionality along a portion of 3D curve; (right) evaluation of the decomposition on simulated trajectories and comparison to a baseline method not based on scale-space (Yang et al., 2016; Ma et al., 2017). (B) Schematic presentation of the processing of 3D curves by the *nAdder* algorithm. (C) Application of *nAdder* to three types of mouse neurons with different arbor shape and size: (C1) striatal D2 medium spiny neuron (Li et al., 2019), (C2) cerebellar Purkinje neuron (Chen et al., 2013), (C3) retinal ganglion cell (Badea & Nathans, 2011). The first three columns show the intrinsic dimensionality decompositions of the neurons at small, medium and large scales. The local 3D scale, computed from suites of such decomposition across multiple scales, is shown in the last column. The maximum scale is set at 160  $\mu\text{m}$  based on the longest branch analyzed. Dotted line boxes (i-v) frame areas of interest discussed in the text.

## nAdder: A scale-space approach for the 3D analysis of neuronal traces

---

156 of the *Xenopus laevis* tectal neuron during development and the effect of altering the expression of Down syndrome  
157 cell adhesion molecule (DSCAM). In this study, the authors showed that downregulation of DSCAM in tectal neuron  
158 dendritic arbors increases the total dendritic length and number branches, while overexpression of DSCAM lowers  
159 them. We reanalyzed neuronal traces generated from the dendritic arbors in this study by computing their local 3D  
160 scale using *nAdder*.

161 Our analysis showed that the mean local 3D scale of developing *X. laevis* tectal neurons overexpressing DSCAM is  
162 smaller than that of control neurons, with a significant difference between the two conditions, 24 and 48 hr after the  
163 start of the observations at Stage 45 (Figure 2A and B); this result is consistent with the original analysis by Santos et al.  
164 (2018), indicating that DSCAM overexpression leads to more simple arbor morphologies, as measured by the number of  
165 branches and length of reconstructed arbors. In their paper, the authors also studied tortuosity, the ratio of curvilinear to  
166 Euclidean length of a trace, a global morphological metric classically used to measure geometric complexity. While the  
167 authors show that DSCAM downregulation increases the tortuosity of the neuron's longest dendritic branch (see Figure  
168 4 of Santos et al. (2018)), they did not report this parameter for DSCAM overexpression. We computed the tortuosity of  
169 the longest branch and indeed observed no significant difference between control and DSCAM overexpressing neurons  
170 at any stage of the analysis (Figure 2C, middle). Interestingly, however, we found that the mean local 3D scale of the  
171 arbors' longest branch (Figure 2C, top) was significant reduced in DSCAM-overexpressing vs. control neurons 24  
172 and 48 hr after the start of the image series. We also observed that the length and mean local 3D scale of the neuron's  
173 longest arbor branch were correlated in control neurons (Figure 2D, left) ( $r = 0.30$ ,  $p$  value = 0.020), but disappeared in  
174 DSCAM-overexpressing neurons (Figure 2D, right). This suggests a subtle effect of DSCAM in uncoupling the length  
175 of neurites and their geometric complexity. Our analysis shows that measuring the neurites' local 3D scale provides  
176 biologically relevant information and can measure subtle differences in the complexity of their trajectory that are not  
177 apparent with classic metrics.

### 178 2.3 Local 3D scale mapping across the whole larval zebrafish brain

179 We next sought to test *nAdder* over a large-scale 3D dataset encompassing entire long-range axonal projections. A  
180 database including 1939 individual neurons traced across larval zebrafish brains and co-registered within a shared  
181 framework has been published by Kunst et al. (2019). The authors clustered neuronal traces into distinct morphological  
182 classes using the NBLAST algorithm (Costa et al., 2016), thus identifying both known neuronal types and putative  
183 new ones. These neuronal traces were also used to build a connectivity diagram between  $36 \times 2$  bilateral symmetric  
184 regions identified in the fish brain, revealing different connectivity patterns in the fore-, mid- and hindbrain. Here, we  
185 reanalyzed this dataset by computing the local 3D scales of all available neuronal traces, focusing on projections linking  
186 distinct brain regions (i.e. that terminated in a region distinct from that of the cell body), interpreted as axons. We then  
187 explored the resulting whole-brain map of the geometric complexity of projection neurons.

188 **Local 3D scale variations across brain regions.** Processing of the 1939 traces of the larval zebrafish atlas with *nAdder*  
189 resulted in a dataset where the local 3D scale of each inter-region projection (i.e. projecting across at least two distinct  
190 regions), when superimposed in the same referential, could be visualized (Figure 3A and S7A). Coordinated variations  
191 in local 3D scale values among neighboring traces were readily apparent on this map, such as in the retina (see region  
192 (i) in Figure 3A) and torus semicircularis (ii) which presented high local 3D scale values, or the octaval ganglion (iii)  
193 characterized by low values.

194 To quantify these local differences, we computed the mean local 3D scale of inter region projections for each of the 36  
195 brain regions defined by Kunst et al. This enabled us to establish an atlas of the local 3D scale of fish axons highlighting  
196 variations of their geometric complexity in different brain regions (Figure 3B and S7B). Similar atlases could be derived  
197 for all projection subsets originating from (Figure S8A), passing through (Figure S9A) or terminating in a region (Figure  
198 S10A), again showing inter-regional variations. The distributions of local 3D scale within each region nevertheless  
199 showed a high variance (Figure 3C, S8B, S9B and S10B), reflecting the diversity of neuronal types and variations in the

nAdder: A scale-space approach for the 3D analysis of neuronal traces

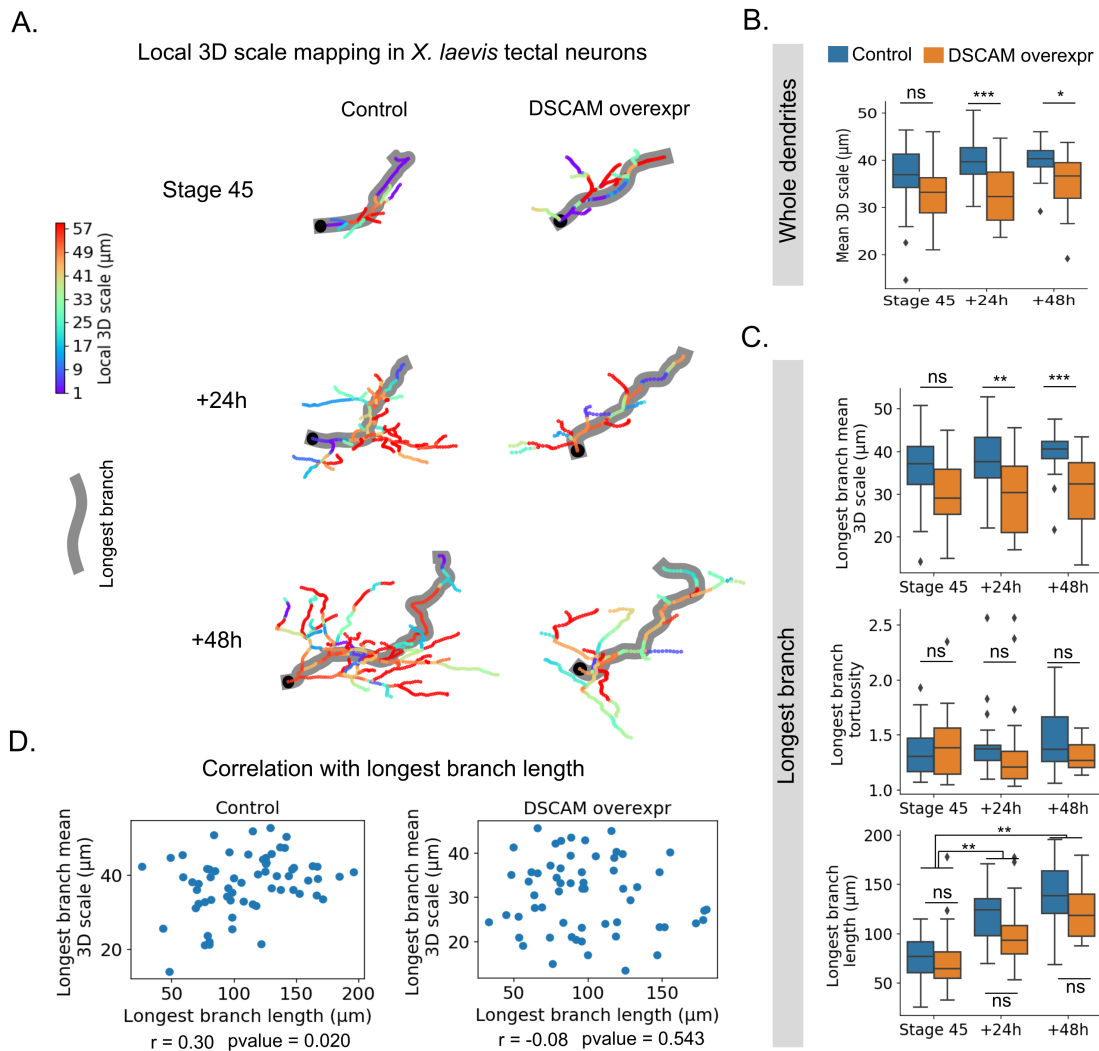

**Figure 2: Local 3D scale analysis in tectal neurons from developing *Xenopus laevis* tadpoles and effect of DSCAM overexpression.** Dendritic arbor traces from *X. laevis* tectal neurons were obtained from Santos et al. (2018). (A) Examples of local 3D scale maps from control (left) and DSCAM-overexpressing (DSCAM overexpr) neurons at Stage 45, and 24 and 48 hr after initial imaging. The maximum scale is set to  $60 \mu\text{m}$  based on the mean length of the arbor's longest branch (highlighted in gray). The cell body's position is indicated by a black square. (B) Evolution of the mean local 3D scale of the whole dendritic arbor from Stage 45, to +24 and +48 hr. (C) Mean local 3D scale (top), tortuosity (middle) and length (bottom) of the longest branch only. Two-way ANOVA, Student's t-test with Holm-Sidak for multiple comparisons were used, \*  $p \leq 0.05$ , \*\*  $p \leq 0.01$ , \*\*\*  $p \leq 0.005$ , \*\*\*\*  $p \leq 0.001$ . (D) Correlation between the mean 3D scale and the longest branch length in control vs. DSCAM-overexpression conditions. Spearman correlation was used.

*nAdder*: A scale-space approach for the 3D analysis of neuronal traces

---

200 local structure of their axons as they exit or enter a brain region. This variability is illustrated in Figure 3D showing  
201 three regions, the Medulla Oblongata Strip 3 (MOS3), Subpallium (SP) and Torus semicircularis (TS), respectively  
202 presenting low ( $\sim 43 \mu\text{m}$ ), medium ( $\sim 51 \mu\text{m}$ ) and high ( $\sim 58 \mu\text{m}$ ) average local 3D scales. Different patterns exhibited  
203 by axons originating from, passing through and arriving in these regions might contribute to this variability (Figure  
204 S11).

205 Different distributions of local 3D scale could be observed in the fore-, mid- and hindbrain regions, with higher average  
206 value in mid- compared to fore- and hindbrain regions (Figure S7C). The difference is clearer for axons terminating in a  
207 region (Figure S10C), but not for axons with soma in these regions and en passant axons (Figures S8C, S9C). This  
208 could relate to the observation that the connectivity strength in the mid- and hindbrain are stronger than that in forebrain  
209 (Kunst et al., 2019).

210 Comparing the mean local 3D scale with the average number of branching points and average length of the traces within  
211 individual regions showed that these parameters were correlated, yet with a high variance (Figure 3E and 3F). However,  
212 when separately analyzing axons connecting to, through or from a region, only those originating from the region  
213 analyzed showed such correlations (Figures S8D-E), which were not apparent when observing passing or arriving axons  
214 (Figures S9D-E and S10D-E). Yet, comparing the local 3D scale of the three types of axons showed that inter-regional  
215 axons terminating in a region had on average higher local 3D scales than those originating from or passing through a  
216 region (Figure 3G). This observation is consistent with the idea that the proximal axonal path and terminal arbor differ  
217 in their complexity, as related to their developmental assembly and function.

218 Together, these results show that the local 3D scale computed with *nAdder* is informative at the whole brain level,  
219 adding a new level of description for analyzing connectomic datasets.

220 **Characterization of axon behavior at defined anatomical locations and along specific tracts.** A key feature of our  
221 metric is its local nature, i.e. its ability to inform on the geometry of single neurites not only globally, but at each  
222 point of their trajectory. This aspect is of interest to investigate the complexity of axonal trajectories not simply as  
223 function of their origin, but also at specific positions or spatial landmarks. For instance, commissural axons that cross  
224 the midline play a major role by interconnecting the two hemispheres and have been well studied, in particular for the  
225 specific way by which they are guided across the midline (Chédotal, 2014). Examining axonal arbors intersecting the  
226 midline in the whole larval fish dataset, we found that a majority (71%) crossed only once, making a one-way link  
227 between hemispheres, while a significant proportion crossed multiple times, with 10% traversing the midline more  
228 than 5 and up to 24 times (Figure 4A and S12A). Most individual branches (i.e. neuronal arbor segments between two  
229 branching points, or between a branching point and the cell body/terminal) crossed the midline just once, meaning that  
230 neurons crossing multiple times did not do so with one long meandering axons but with many distinct branches of their  
231 arbor (Figure S12B). Examples of such axonal arbors crossing the midline more than 10 times are shown in Figure 4A.  
232 Measuring the local 3D scale of crossing axon branches in a  $20 \mu\text{m}$  range centered on the midline (Figure 4B), we  
233 observed higher values for the ones traversing the midline several times compared to those only crossing once (Figure  
234 4C, top). Axon branches crossing the midline multiple times were also much shorter than those crossing only once  
235 (Figure 4C, bottom). They localized mostly in the hindbrain in a ventral position (Figure 4D), while single crossings  
236 were frequent in the forebrain commissures. Finally, we found no link between the length and local 3D scale of crossing  
237 branches (Figure S12C). This is consistent with the existence of two populations of commissural axons in the vertebrate  
238 brain, the hindbrain being home to neurons following complex trajectories across the midline with many short and  
239 convoluted branches, and forebrain commissural neurons forming longer and straighter axons.

240 The local 3D scale metric can also serve to compare axon trajectories along entire tracts and characterize their average  
241 behavior. To illustrate this, we analyzed two distinct, well known cell types forming long-range axonal projections  
242 involved in sensory perception. We used *nAdder*, first studying the axon trajectories of retinal ganglion cells (RGCs)  
243 from the fish atlas, each originating in the retina and terminating in the tectum (Figure 4E). We observed that the



nAdder: A scale-space approach for the 3D analysis of neuronal traces

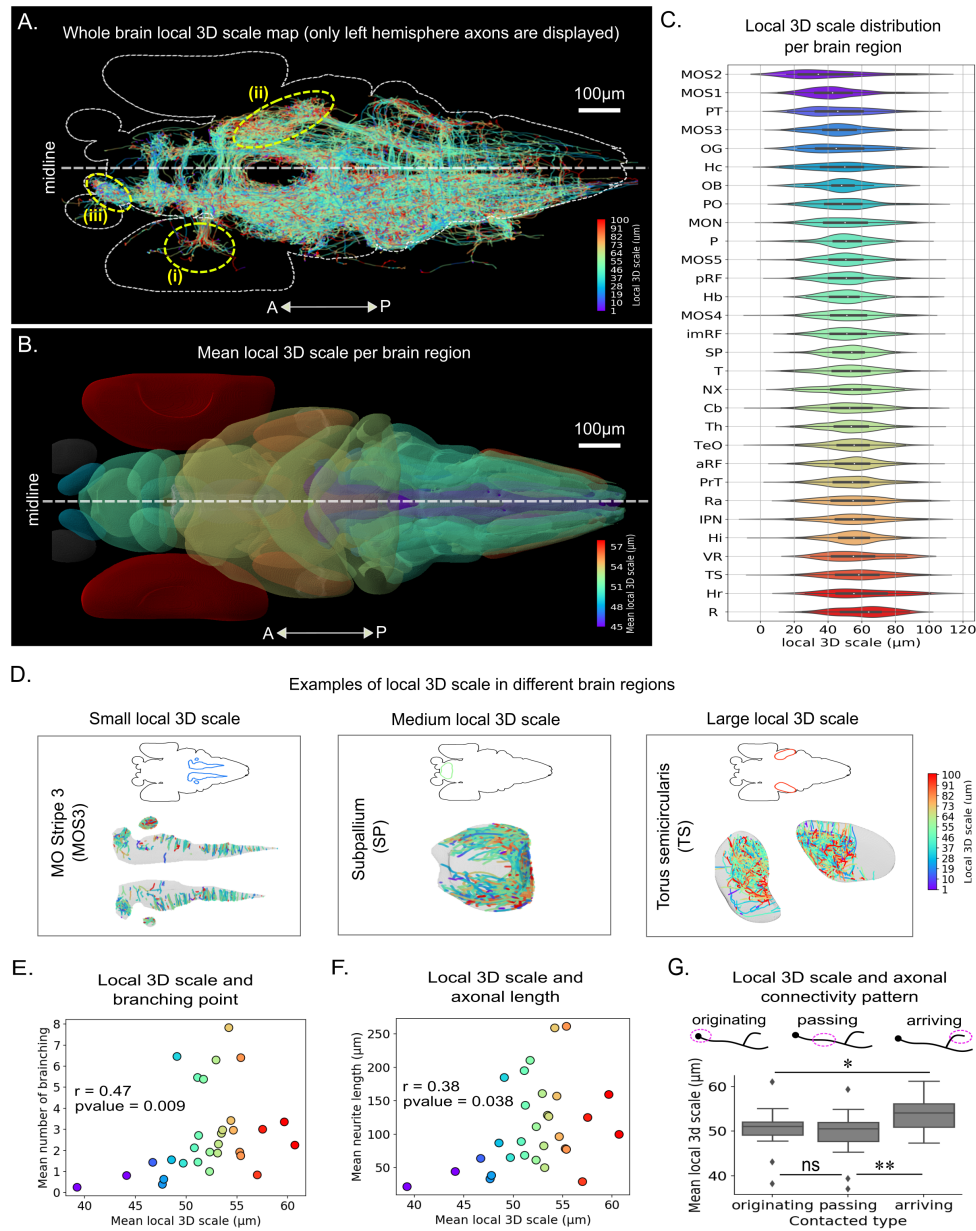

**Figure 3: Local 3D scale mapping across the whole larval zebrafish brain.** Traces analyzed correspond to those presented in [Kunst et al. \(2019\)](#). (A) Local 3D scale analysis of all axonal traces originating from neurons in the left hemisphere; the maximum scale is set to 100  $\mu\text{m}$  based on the width of the largest brain region. (B) Mean local 3D scales by brain regions. Regions with fewer than 15 traces are excluded (in gray). Values were clipped from the 5th to 95th percentiles for clearer display. (C) Distribution of the local 3D scale values in each brain region (see Table S1 for abbreviation definitions). (D) Examples of local 3D scale mapping for axonal traces in three brain regions respectively presenting low, medium and high mean 3D scale: the Medulla Oblongata Strip 3 (left), the Subpallium (middle), and Torus Semicircularis (right). (E, F) Correlation between the mean local 3D scales and average number of branching points (E) and trace length (F) in different brain regions. Spearman correlation was used. (G) Mean local 3D scale of axons originating from, passing through, and arriving to each brain region. Wilcoxon tests with Holm-Sidak correction for multiple comparison was used, \*  $p \leq 0.05$ , \*\*  $p \leq 0.01$ , \*\*\*  $p \leq 0.005$ , \*\*\*\*  $p \leq 0.001$ . Color scale in C, E, F corresponds to that used in B.

244 local 3D scale of these axons presented clear heterogeneity across regions. To quantify this, we examined RGC axon  
245 trajectories in 5 portions of the retinotectal path: within the retina, at the retinal exit, at the midline, just prior to entering  
246 the tectum and within the tectum. We observed significant differences between these regions, with the mean local  
247 3D scales at the midline presenting low values ( $\sim 50 \mu\text{m}$ ) compared to the retina, the tectum, and their exit/entrance  
248 regions ( $\sim 63 \mu\text{m}$ ). We then used *nAdder* to analyze a second population, the trajectories of Mitral cell axons originating  
249 in the olfactory bulb (OB) and projecting to multiple destinations in the pallium (P), subpallium (SP) or habenula  
250 (Hb) (Miyasaka et al., 2014). Here again we found variations in axonal complexity across regions (Figures 4F), with  
251 relatively low local 3D scales in the OB ( $\sim 40 \mu\text{m}$ ) and Hb formation ( $\sim 37 \mu\text{m}$ ) compared to higher values in the P  
252 ( $\sim 50 \mu\text{m}$ ) and SP ( $\sim 47 \mu\text{m}$ ). Overall, this indicates that local 3D scale is a relevant measure of geometric complexity at  
253 the single axon level, both to inform on specific points of their trajectory and to compare them within a neuronal class.

254 *Local 3D scale analysis of a brain region, the Torus Semicircularis.* Finally, we investigated local 3D scale across  
255 different axonal populations innervating a given brain region. We performed this analysis in the Torus Semicircularis  
256 (TS) which presents a high average local 3D scale, with many complex axonal traces (Figure 3D right panel and S11  
257 last row). Most of these traces corresponded to axons with terminations in the TS (70% vs. 5% axons emanating from  
258 TS and 25% axons passing through TS). Focusing on this population, we selected three groups of axons originating  
259 from the Tectum (TeO), Medial Octavolateral Nucleus (MON) and Medulla Oblongata Stripe 5 (MOS5), respectively,  
260 excluding other regions from which only a small number ( $< 10$ ) of incoming axons had been traced (a detailed list of all  
261 regions with traces terminating in the TS is in Table S2). Axons coming from the TeO terminated in the ipsilateral TS  
262 (Figures 5A and 5B), in contrast to MON/MOS5 axons which connected the contralateral TS after crossing the midline  
263 (Figures 5D and 5E). Examining the distribution of local 3D scale inside the TS, we observed that tectal axons overall  
264 had a simpler structure, characterized by lower local 3D scale values than those coming from the MON/MOS5 (Figures  
265 5C and 5F). In particular, complex axons with a local 3D scale above  $150 \mu\text{m}$  mostly originated from the MON/MOS5.  
266 This difference, revealed by *nAdder*, points to the existence of divergent developmental mechanisms of pathfinding  
267 and/or synaptogenesis for these two populations of axons within a shared target area.

268 We then focused on axons projecting from the MON/MOS5 to the TS. We computed the local 3D scale of these axons  
269 at all coordinates of their trajectory from the MON/MOS5 to the TS, normalized with respect to total length (Figure  
270 5G). We found that these axons' local 3D scale was highly correlated and that its average value varied widely along  
271 their course from the MON/MOS5 to the TS: low at the start, it increased inside the MON/MOS5 before dropping when  
272 the axons crossed the midline. It then increased again as they made a sharp anterior turn, dropped again within the  
273 straight tract heading to the TS, before rising to maximum values inside the TS. This result provides a striking example  
274 of stereotyped geometrical behavior among individual axons linking distant brain areas, likely originating from a same  
275 type of neurons, that our metric is able to pick up and report.

276 Overall, our analysis of the larval zebrafish brain atlas demonstrates that *nAdder* can be efficiently applied to connectomic  
277 datasets to probe structural heterogeneity and identify patterns among individual axons and population of neurons.

### 278 3 Materials and Methods

#### 279 3.1 Intrinsic dimension decomposition of neurite branches based on scale-space theory

280 **Intrinsic dimension decomposition** Let's consider a 3D parametric curve  $\gamma(u) = (x(u), y(u), z(u))$  for  $u \in [0, 1]$ ;  
281 the *intrinsic dimensionality* of that curve can be defined as the smallest dimension in which it can be expressed without  
282 significant loss of information. An *intrinsic dimension decomposition* is a decomposition of a 3D curve into consecutive  
283 fragments of different intrinsic dimensionality, i.e. lying intrinsically on a 1D line, 2D plane or in 3D. Note that such  
284 decomposition needs not be unique. For example, not taking scales into account, two consecutive lines followed by one  
285 plane can in theory be decomposed into one 3D fragment, one 1D and one 3D fragments, two consecutive 1D and one  
286 2D fragments, or two consecutive 2D fragments (Figure S1). The last two decomposition schemes are both meaningful

nAdder: A scale-space approach for the 3D analysis of neuronal traces

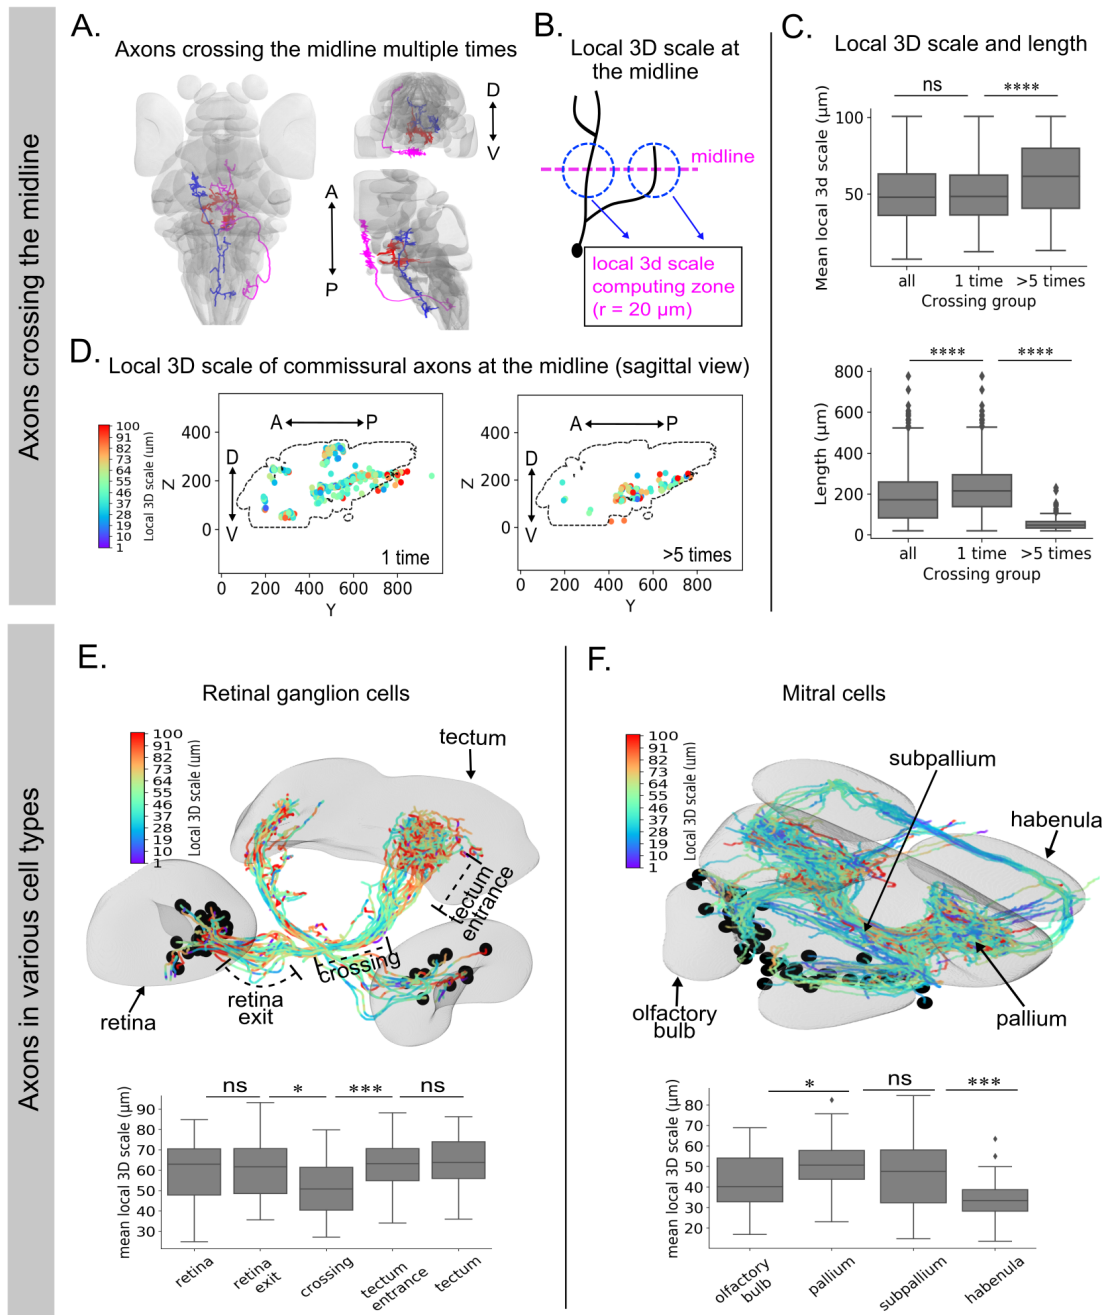

Figure 4: **Local 3D scale analysis of specific locations and axonal tracts of the zebrafish brain.** (A) Example of axonal arbors with many branches crossing the midline. (B) Diagram summarizing computation of the local 3D scale at the midline. (C) Local 3D scale (top) and length (bottom) of all axons crossing the midline vs. those crossing only once and more than five times. (D) View of the midline sagittal plane showing the local 3D scale of axons crossing only once and more than five times. The maximum scale is set to 100  $\mu\text{m}$  based on the width of the largest brain region analyzed. (E, F) Local 3D scale variation along axons of retina ganglion cells (E) and mitral cells (F). Wilcoxon tests with Holm-Sidak corrections for multiple comparison were used, \*  $p \leq 0.05$ , \*\*  $p \leq 0.01$ , \*\*\*  $p \leq 0.005$ , \*\*\*\*  $p \leq 0.001$ .

nAdder: A scale-space approach for the 3D analysis of neuronal traces

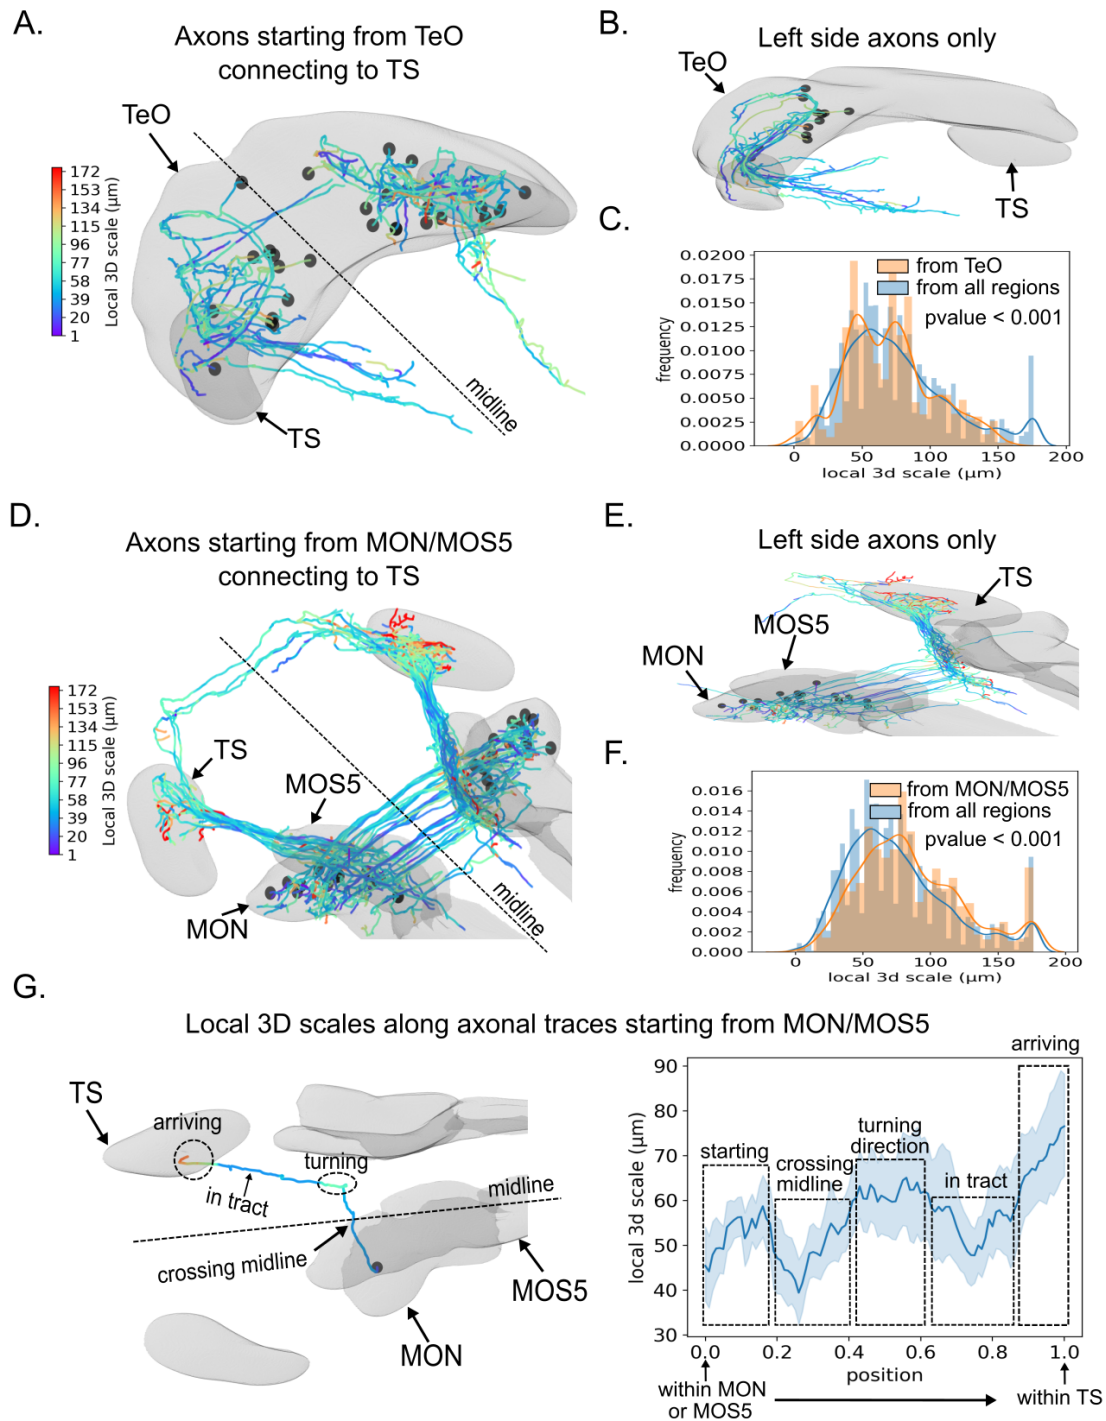

**Figure 5: Local 3D scale of different axonal populations terminating in the zebrafish Torus Semicircularis (TS).** (A, D) *nAdder* analysis of TS-terminating axons originating from the Tectum (TeO) (A) and Medial Octavolateral Nucleus (MON) or Medulla Oblongata Strip 5 (MOS5) (D). (B, E) Views restricted to axons originating from the left hemisphere. (C, F) Distribution of local 3D scale for the set of axons arriving from the TeO (C) and MON/MOS5 (F) compared to all axons arriving in the TS. Student's t-test was used. (G) Local 3D scale variations along axons coming from MON/MOS5. Left, example view of one neuron indicating different segments of interest. Right, quantification ( $n = 32$  axons). The maximum scale is set to  $175 \mu\text{m}$  based on the mean length of the longest branches. Only the longest branches are included in the computation.

287 and their combination represents a hierarchical decomposition of  $\gamma$  where linear fragments are usually parts of a larger  
288 planar fragment.

Here, we compute the decomposition of a curve intrinsically by looking at the curvature and torsion. Let us define the curvature  $\kappa$  of  $\gamma$  by  $\kappa = \|\gamma' \times \gamma''\|/\|\gamma'\|^3$ , corresponding to the inverse of the radius of the best approximation of the curve by a circle locally, the osculating circle. The torsion  $\tau$  of  $\gamma$  is  $\tau = ((\gamma' \times \gamma'') \cdot \gamma''')/\|\gamma' \times \gamma''\|^2$  and corresponds to the rate of change of the plane that includes the osculating circle. We then determine that if  $\kappa$  is identically equal to zero on a fragment then that fragment is a 1D line; similarly  $\tau$  being identically equal to zero defines a 2D arc curve. Thus we define a linear indicator  $L$  of  $\gamma$ :

$$L(u) = \begin{cases} 1, & \text{if } \kappa(u) \leq \varepsilon_\kappa \\ 0, & \text{otherwise,} \end{cases}$$

and a planar indicator  $H$  of  $\gamma$ :

$$H(u) = \begin{cases} 1, & \text{if } |\tau(u)| \leq \varepsilon_\tau \\ 0, & \text{otherwise,} \end{cases}$$

289 where  $\varepsilon_\kappa$  and  $\varepsilon_\tau$  are the tolerances for computed numerical errors. We note that only using the  $H$  indicator is not  
290 sufficient to estimate the 2D plane. For example, a 2D plane fragment composed of a 1D line followed by a 2D arc  
291 cannot be entirely identified as 2D since the torsion is not defined as the curvature tends to 0. We therefore consider the  
292 planar-linear indicator  $T = L \cup H$  instead of  $H$  for characterizing the curve according to such hierarchical order.

293 **Scale space** In practice, the resulting dimension decomposition is closely tied to a ‘scale’ at which the curve is studied,  
294 i.e. up-close all differentiable curves are well approximated by their tangent and thus would be linear. That property  
295 have been formalised through *Scale-spaces*, which have been described for curves in 2D (Mackworth & Mokhtarian,  
296 1988) or 3D (Mokhtarian, 1988) in particular, to give a robust meaning to that intuition. A scale-space is typically  
297 defines as a set of curves  $\gamma_s$  such that  $\gamma_0 = \gamma$  and increasing  $s$  leads to increasingly simplified curves. The scaled  
298 curve can be calculated by convolving  $\gamma$  with a Gaussian kernel of standard deviation  $s$  (Witkin, 1983), or by using  
299 mean curvature flow (Gage & Hamilton, 1986). In 2D, it has been shown for example that a closed curve under a mean  
300 curvature motion scale space will roundup with increasing  $s$  and eventually disappear into a point (Grayson, 1987).

301 However, the selection of a scale of interest representing a meaningful description of a curve is not straightforward. A  
302 scale defined as the standard deviation of the Gaussian kernel as above for example will be influenced by the kernel  
303 length and the curve sampling rate, and would be unintuitive to set. To make the scales become a more relevant  
304 physical/biological measurement, we employ as scale parameter the radius of curvature  $r_\kappa$ , the inverse of the curvature  
305  $\kappa$ , in  $\mu\text{m}$ . For a given curve, the level of detail can be characterized by the maximal  $r_\kappa$  along that curve, with scales  
306 keeping small  $r_\kappa$  represents high level of detail looking at small objects such as small bumps and tortuosity and scales  
307 smoothing the curve out and keeping only larger  $r_\kappa$  represents lower level of detail, and larger object and features such  
308 as plateaus or turns. Thus, to ease the interpretation and usage of scale spaces, we associate to a scale in micron  $\hat{r}_\kappa$  a set  
309 of standard deviation  $s$ , by determining, for a curve, for each point  $u$  whose  $r_\kappa(u) < \hat{r}_\kappa$  the standard deviation  $s$  such  
310 that  $r_{\kappa_s}(u) = \hat{r}_\kappa$ . This therefore associates, for each curve, an anatomically relevant scale of interest in micron  $\hat{r}_\kappa$  and  
311 the list  $S$  of standard deviations that lead to that curve having no points with curvature radius smaller than  $\hat{r}_\kappa$ . We will  
312 then use  $S$  to estimate the dimension decomposition of  $\gamma$  at scale  $\hat{r}_\kappa$  in two steps, first by computing our indicators for  
313 all  $s \in S$ , then by selecting, across  $S$ , the best decomposition.

314 First we compute  $L_s$  and  $T_s$  by calculating the curvatures  $\kappa_s$  and the torsions  $\tau_s$ . We then exclude fragments smaller  
315 than a length threshold  $\varepsilon_\omega$  at every  $s$  to eliminate small irrelevant fragments. From  $L_s$  and  $T_s$ , the linear fragments  
316 denoted as  $\mathcal{D}_{L_s}$  and planar-linear fragments denoted as  $\mathcal{D}_{T_s}$  are deduced across all  $s \in S$ . An example of this sequence  
317 of dimension decompositions is illustrated in Figure S4 where  $\mathcal{D}_{L_s}$  and  $\mathcal{D}_{T_s}$  are superimposed. The curve is completely

318 3D at low  $s$  value, several linear and planar fragments then appear at higher  $s$ , progressively fuse to form larger linear  
319 and planar fragments and eventually converge to one unique line at very high value of  $s$ .

320 In the second step, we estimate the most durable combination of fragments from the linear segments  $\mathcal{D}_{L_s}$  and linear-  
321 planar segments  $\mathcal{D}_{T_s}$  calculated in the first step. We compute the number of fragments at every  $s \in S$ , to measure how  
322 long each combination of fragments exists. We then select the combination of fragments remaining for the longest  
323 subinterval of  $S$ . Knowing that each fragment in the combination can have different lengths among that subinterval, we  
324 thus select the longest candidate. In cases where fragments overlap, we split the overlap in half. Of note, we repeat this  
325 step twice, first to estimate the best combination of linear-planar segments from  $\mathcal{D}_{T_s}$  input and mark the corresponding  
326 subinterval, then to estimate the best combination of linear fragments from  $\mathcal{D}_{L_s}$  input within that subinterval. As seen  
327 in Figure S4, the curve is decomposed at every  $s$  in consecutive planar/nonplanar fragments, then the linear fragments  
328 are identified within each planar fragment. The final result is the hierarchical dimension decomposition of the curve  $\gamma$   
329 at a given scale of interest  $\hat{r}_\kappa$ .

### 330 3.2 Evaluation of dimension decomposition on simulated curve

The simulated curve consists of consecutive 1D lines, 2D planes and 3D regions. The simulation of 1D lines is done by simply sampling a sequence of points on an arbitrary axis (e.g.  $x$  axis), then rotating it in a random orientation in 3D. The simulation of random yet regular 3D fragments embedded in a 2D plane is more challenging. We tackle this issue by using the active Brownian motion model (Volpe et al., 2014). Active Brownian motion of particles is an extended version of the standard Brownian motion (Uhlenbeck & Ornstein, 1930) by adding two coefficients the translational speed to control directed motion and the rotational speed to control the orientation of the particles. At each time point, we generate the new coordinates  $(x, y, 1)$  by the following formulas:

$$\begin{aligned} D_T &= \frac{k_B T}{6 \pi \eta R} \\ D_R &= \frac{k_B T}{8 \pi \eta R^3} \\ \frac{d}{dt} \varphi(t) &= \Omega + \sqrt{2 D_R} W_\varphi \\ \frac{d}{dt} x(t) &= v \cos \varphi(t) + \sqrt{2 D_T} W_x \\ \frac{d}{dt} y(t) &= v \sin \varphi(t) + \sqrt{2 D_T} W_y, \end{aligned}$$

where  $D_T$  and  $D_R$  are the translational and rotational coefficients,  $k_B$  the Boltzmann constant,  $T$  the temperature,  $\eta$  the fluid viscosity,  $R$  particle radius,  $\varphi$  rotation angle,  $\Omega$  angular velocity and  $W_\varphi, W_x, W_y$  independent white noise. After generating the simulated intrinsic 2D fragment, a random rotation is applied. For simulating a 3D fragment, we extended the Active Brownian motion model in 2D (Volpe et al., 2014) to 3D as follows:

$$\begin{aligned} \frac{d}{dt} \varphi(t) &= \cos \Omega + \sqrt{2 D_R} W_\varphi \\ \frac{d}{dt} \theta(t) &= \sin \Omega + \sqrt{2 D_R} W_\theta \\ \frac{d}{dt} x(t) &= v \cos \theta(t) \sin \varphi(t) + \sqrt{2 D_T} W_x \\ \frac{d}{dt} y(t) &= v \sin \theta(t) \sin \varphi(t) + \sqrt{2 D_T} W_y \\ \frac{d}{dt} z(t) &= v \cos \varphi(t) + \sqrt{2 D_T} W_z, \end{aligned}$$

331 where  $(\varphi, \theta)$  are spherical angles. We simulate the curve  $\gamma$  with a sequence of  $n_\omega$  consecutive fragments of varying  
332 random intrinsic dimensions. The curve  $\gamma$  is then resampled equally with  $n_\gamma$  points and white noise  $\mathcal{N}(0, \sigma^2)$  is added.

333 We set  $n_\omega \leq 5$ ,  $n_\gamma = 1000$  points and vary  $\sigma$  between 1 and  $30 \mu m$ . The upper value of  $\sigma = 30 \mu m$  is high enough to  
334 corrupt local details of a simulated fragment with about  $100 \mu m$  of length in our experiment.

The metric used to measure the accuracy of the intrinsic dimension decomposition, defined to be between 0.0 and 1.0 and measures an average accuracy across fragments, is given by  $(1/n_\omega) \sum_i \max_j \xi(\omega_i, \hat{\omega}_j)$ , where  $\{\omega_1, \omega_2, \dots, \omega_{n_\omega}\}$  are the simulated intrinsic fragments,  $\{\hat{\omega}_1, \hat{\omega}_2, \dots, \hat{\omega}_{n_\omega}\}$  the estimated intrinsic fragments and  $\xi(.,.)$  the  $F_1$  score (Rijsbergen, 1979) calculated by:

$$2 \times \frac{Precision \times Recall}{Precision + Recall},$$

where

$$Precision = \frac{|\omega \cup \hat{\omega}|}{|\hat{\omega}|} \quad \text{and} \quad Recall = \frac{|\omega \cup \hat{\omega}|}{|\omega|}.$$

335 In order to evaluate our intrinsic dimensions decomposition algorithm, we look at the curve  $\gamma$  at various scales  
336  $r_\kappa = 1, 2, \dots, 100 \mu m$ , then perform the dimension decomposition for every  $r_\kappa$ . Setting  $r_\kappa = 100 \mu m$  is large enough  
337 to get a smoothed curve whose simulated intrinsic fragments are no longer preserved. In addition, we also removed  
338 estimated fragments whose lengths were smaller than  $\varepsilon_\omega$ . Here we set  $\varepsilon_\omega = 5\%$  of the curve length since it does  
339 not surpass the minimal length of simulated intrinsic fragments. While automatic determination of an optimal scale  
340 is not studied in this paper, with the *nAdder* algorithm being in part meant to sidestep this complex issue altogether  
341 by computing a single metric across scales, we have to chose a scale for the evaluation. We either take the one  
342 corresponding to the largest accuracy (optimal scale, Figure S2) or one at a fixed scale (Figure S3),  $r_\kappa = 20 \mu m$ , small  
343 enough to avoid deforming the simulated curve. Our method is then compared with a baseline method (Yang et al.,  
344 2016; Ma et al., 2017) that first iteratively assigns each point on the curve as linear/nonlinear by a collinearity criterion,  
345 then characterize nonlinear points as planar/nonplanar by a coplanarity criterion. For both methods, the curve was first  
346 denoised based on Czesla et al. (2018).

### 347 3.3 Local 3D scale computation

348 Assuming a scale interval of interest, the local 3D scale of a point on a curve is computed by iteratively checking at  
349 each scale the intrinsic dimension of that point and taking the scale at which the local scale is not 3D anymore. In some  
350 cases, the dimension transformation of a point is not smooth, since the point at a 2D/1D scale can convert back to 3D.  
351 We therefore select the first scale of the longest 2D/1D subinterval as local 3D scale. In case no subintervals are found,  
352 it means that the point remains 3D across the whole interval and its local 3D scale is set as the highest scale.

### 353 3.4 Local 3D scale analysis of neuronal traces

354 We consider a neuronal trace as a 3D tree and first resample it with a spacing distance between two points equal to 1  
355  $\mu m$ . B-spline interpolation (Boor, 1978) of order 2 is used for the resampling. We then decompose the neuronal arbor  
356 into potentially overlapping curves, since the intrinsic dimension decomposition and local 3D scale are computed on  
357 individual neuronal branches. Several algorithms are available for tree decomposition. We explored three, functioning  
358 either by longest branch (first taking the longest branch, then repeating this process for all subtrees extracted along  
359 the longest branch), by node (taking each curve between two branching nodes) or by leaf (taking, for each leaf, the  
360 curve joining the leaf to the root). Local scales were computed for all three considered decompositions and the ‘leaf’  
361 decomposition was found to give the most robust and meaningful results as shown in Figure S5. That method gives  
362 partially overlapping curves; thus, we compute the average of the values when needed; we verified that the standard  
363 deviations were small.

364 Next, the local 3D scale is computed for each extracted sub-branch within a scale interval of interest. The scale is  
365 defined as the radius of curvature and can be selected based on the size of the branches or that of the region studied.  
366 For example, in the case of *Xeonopus Laevis* tadpole neurons (Figure 2), we selected scales from 1 to  $60 \mu m$  which

## nAdder: A scale-space approach for the 3D analysis of neuronal traces

was sufficient to study neuronal branches of about  $180 \mu\text{m}$  in length (i.e. a  $60 \mu\text{m}$  radius of curvature corresponds to a semicircle with length equal to  $60\pi \approx 180 \mu\text{m}$ ). In the case of the zebrafish brain dataset (Figure 3), we selected scales from 1 to  $100 \mu\text{m}$  based on the length of the largest region, which was about  $300 \mu\text{m}$ . When studying axons arriving to the Torus Semicircularis (Figure 5), we set the maximum scale to  $175 \mu\text{m}$  as the neuronal branches are on average  $525 \mu\text{m}$  long. Moreover, we excluded the sub-branches whose lengths are smaller than a threshold set to  $5 \mu\text{m}$ , which is half the size of the smallest brain region. Branches shorter than  $5 \mu\text{m}$  contribute very little to the local 3D scale result. This is also useful to reduce artifact caused by manual tracing of neurons.

### 3.5 Toolset for neuronal traces manipulation

We provide an open source Python toolset for seamless handling of 3D neuronal traces data. It supports reading from standard formats (swc, csv, etc), visualizing, resampling, denoising, extracting sub-branches, calculating basic features (branches, lengths, orientations, curvatures, torsions, Strahler order (Horton, 1945), etc), computing the proposed intrinsic dimension decompositions and the local 3D scales. The toolset is part of the open source Python library GeNePy3D (Phan & Chessel, 2020) available at <https://genepy3d.gitlab.io/> which gives full access to manipulation and interaction of various kinds of geometrical 3D objects (trees, curves, point cloud, surfaces).

### 3.6 Analyzed neuronal traces datasets

The traces used in our studies are all open and available online for downloading. They consist of neuronal reconstructions from NeuroMorpho.Org and the Max Planck Zebrafish Brain Atlas listed in the table below:

| Name                 | Source article          | Download page                                                                                                 | Search key                                              | Note        |
|----------------------|-------------------------|---------------------------------------------------------------------------------------------------------------|---------------------------------------------------------|-------------|
| Medium spiny neuron  | (Li et al., 2019)       | <a href="http://neuromorpho.org">http://neuromorpho.org</a>                                                   | by neuron name: <i>3817_CPi_PHAL_Z001_app2_split_34</i> | Section 2.1 |
| Purkinje neuron      | (Chen et al., 2013)     | <a href="http://neuromorpho.org">http://neuromorpho.org</a>                                                   | by neuron name: <i>Purkinje-slice-age P43-6</i>         | Section 2.1 |
| Retina ganglion cell | (Badea & Nathans, 2011) | <a href="http://neuromorpho.org">http://neuromorpho.org</a>                                                   | by neuron name: <i>Badea2011Fig2Ca-R</i>                | Section 2.1 |
| Xenopus laevis       | (Santos et al., 2018)   | <a href="http://neuromorpho.org">http://neuromorpho.org</a>                                                   | by archive: <i>Cohen-Cory</i>                           | Section 2.2 |
| Zebrafish atlas      | (Kunst et al., 2019)    | <a href="https://fishatlas.neuro.mpg.de/neurons/download">https://fishatlas.neuro.mpg.de/neurons/download</a> | by neuron groups: <i>Kunst et al</i>                    | Section 2.3 |

## 4 Discussion

We presented a novel method for the multiscale estimation of intrinsic dimensions along an open 3D curve and used it to compute a local 3D scale, which we propose as a new local metric to characterize the geometrical complexity of neuronal arbors. We demonstrated that our method, dubbed *nAdder*, is accurate and robust, and applied it to published trace data, showing its relevance and usefulness to compare neurite trajectories from the level of single neurons to the whole brain.

Our new approach provides a solution to the problem of measuring the geometrical complexity of 3D curves not just globally but also locally, i.e. at successive points of their trajectory. It enables to compute the dimensionality of such curves at any position, for a given scale of analysis. By scanning the scale space, one can then determine the value at which the curve requires all three dimensions of space for its description, a sampling-independent local metric which



*nAdder*: A scale-space approach for the 3D analysis of neuronal traces

---

395 we term the local 3D scale. Mathematically, scale spaces of curves are trickier to implement in 3D than in 2D and have  
396 been much less studied. In 2D for example, scale spaces based on curvature motion are known to have advantageous  
397 properties compared to Gaussian ones: they arise naturally from principled axiomatic approaches, are well described  
398 mathematically and can be computed through well characterized numerical solutions of partial differential equations  
399 (Cao, 2003). They are readily extended to 3D surfaces by using principal curvatures (Brakke, 2015), but no simple  
400 equivalent is known for 3D curves. One theoretical issue is that using only the curvature to determine the motion of 3D  
401 curves would not affect the torsion, and for example a set of increasingly tighter helices would have increasingly higher  
402 curvature but identical torsion. Here, we provided and thoroughly evaluated a practical solution to this problem by  
403 associating a spatial scale to an ensemble of Gaussian kernels. In future work, additional theoretical studies of 3D scale  
404 spaces of curves could potentially lead to simpler and more robust algorithms with solid mathematical foundations.

405 The *nAdder* approach fills a gap in the methodologies available to analyze neuronal traces, which until now were  
406 lacking a straightforward way to measure their geometrical complexity and its variations, both within and between  
407 traces. It is complementary to techniques classically used to study the topology of dendritic and axonal arbors (number  
408 and position of branching points, for example), providing a geometrical dimension to the analysis that is both simpler  
409 and more robust than the alternative direct computation of curvature and torsion. In practice, the local 3D scale of  
410 neurons (as measured with *nAdder* and observed in this study) ranges from 0 to 100-200  $\mu\text{m}$ . The lowest values are  
411 typically found in axonal tracts that follow straight trajectories, or in special cases such as the planar dendritic arbor of  
412 cerebellar Purkinje neurons shown in Figure 1C2. Higher, intermediate values are for instance observed at inflexion  
413 points along tracts where axons change course in a concerted manner. The highest values of local 3D scale typically  
414 characterize axonal arbor portions where their branches adopt a more exploratory behavior, in particular in their most  
415 distal segments where synapses form. A striking example is given in Figure 5G, showing the trajectory of an axon  
416 from the MON/MOS5 to the torus semicircularis, where changes in local 3D scale correlate with distinct successive  
417 patterns: a straight section through the midline, a sharp turn followed by another straight section before more complex  
418 patterns in the target nucleus. Importantly, *nAdder* not only enables to quantify how geometric complexity varies along  
419 a single axon trace, but also to compare co-registered axons of a same type and to characterize coordinated changes  
420 in their behavior (Figure 5G, right panel). It thus offers a way to identify key points and stereotyped patterns along  
421 traces. This will be of help to study and hypothesize on the developmental processes at the origin of these patterns, such  
422 as guidance by attractive or repulsive molecules (Lowery & Van Vactor, 2009), mechanical cues (Gangatharan et al.,  
423 2018), or pruning (Lichtman & Colman, 2000; Riccomagno & Kolodkin, 2015).

424 The high values of local 3D scale near-systematically observed in the most distal part of axonal arbors are also of strong  
425 interest, as these segments typically undergo significant activity-based remodeling accompanied by branch elimination  
426 during postnatal development (Lichtman & Colman, 2000), resulting in complex, convoluted trajectories in adults  
427 (Keller-Peck et al., 2001; Lu et al., 2009). In accordance with this, we observed a correlation between local 3D scale  
428 and axon branching at the whole brain level (Figure 3E). Further integrating topological and geometrical analysis and  
429 linking these two aspects with synapse position could then be a very beneficial, if challenging, extension of *nAdder*. To  
430 this aim, one would greatly benefit from methods enabling both faithful multiplexed axon tracing over long distances  
431 and mapping of the synaptic contacts that they establish. Progress in volume electron (Motta et al., 2019), optical  
432 (Abdeladim et al., 2019) or X-ray holographic microscopy (Kuan et al., 2020) will be key to achieve this in vertebrate  
433 models.

434 Beyond neuroscience, we also expect *nAdder* to find applications in analyzing microscopy data in other biological  
435 fields wherever 3D curves are obtained. For example, it could help characterizing the behavior of migrating cells during  
436 embryogenesis (Faure et al., 2016), or be used beside precise biophysical models to interpret traces from single-particle  
437 tracking experiments (Shen et al., 2017).

438 Importantly, an implementation of the proposed algorithms, along with all codes to reproduce the figures, is openly  
439 available, making it a potential immediate addition to computational neuroanatomy studies. Specifically, *nAdder* is part

440 of GeNePy3D, a larger quantitative geometry Python package providing access to a range of methods for geometrical  
441 data management and analysis. More generally, it demonstrates the interest of geometrical mathematical theories  
442 such as spatial statistics, computational geometry or scale-space for providing some of the theoretical concepts and  
443 computational algorithms needed to transform advanced microscopy images into neurobiological understanding.

#### 444 **Acknowledgments**

445 This work was supported by Agence Nationale de la Recherche (contract ANR-11-EQPX-0029 Morphoscope2) as well  
446 as Fondation pour la Recherche Médicale (DBI20141231328) and Agence Nationale de la Recherche under contracts  
447 LabEx LIFESENSES (ANR-10-LABX-65) and IHU FOReSIGHT (ANR-18-IAHU-01).

#### 448 **References**

- 449 Abdeladim, L., Matho, K. S., Clavreul, S., Mahou, P., Sintès, J.-M., Solinas, X., ... Beaufrepère, E. (2019, April).  
450 Multicolor multiscale brain imaging with chromatic multiphoton serial microscopy. *Nature Communications*, *10*(1),  
451 1–14. doi: 10.1038/s41467-019-09552-9
- 452 Adkins, R. S., Aldridge, A. I., Allen, S., Ament, S. A., An, X., Armand, E., ... Zingg, B. (2020). A multimodal cell  
453 census and atlas of the mammalian primary motor cortex. *bioRxiv*. Retrieved from [https://www.biorxiv.org/  
454 content/early/2020/10/21/2020.10.19.343129](https://www.biorxiv.org/content/early/2020/10/21/2020.10.19.343129) doi: 10.1101/2020.10.19.343129
- 455 Arshadi, C., Eddison, M., Günther, U., Harrington, K. I. S., & Ferreira, T. A. (2020, July). SNT: A Unifying  
456 Toolbox for Quantification of Neuronal Anatomy. *bioRxiv*, 2020.07.13.179325. Retrieved 2020-08-03, from  
457 <https://www.biorxiv.org/content/10.1101/2020.07.13.179325v1> doi: 10.1101/2020.07.13.179325
- 458 Ascoli, G. A. (2006, April). Mobilizing the base of neuroscience data: the case of neuronal morphologies. *Nature*  
459 *Reviews. Neuroscience*, *7*(4), 318–324. doi: 10.1038/nrn1885
- 460 Ascoli, G. A., Donohue, D. E., & Halavi, M. (2007, August). NeuroMorpho.Org: A Central Resource for Neuronal  
461 Morphologies. *Journal of Neuroscience*, *27*(35), 9247–9251. Retrieved 2020-05-20, from [https://www.jneurosci  
462 .org/content/27/35/9247](https://www.jneurosci.org/content/27/35/9247) (Publisher: Society for Neuroscience Section: Toolbox) doi: 10.1523/JNEUROSCI  
463 .2055-07.2007
- 464 Badea, T. C., & Nathans, J. (2011, January). Morphologies of mouse retinal ganglion cells expressing transcription  
465 factors Brn3a, Brn3b, and Brn3c: analysis of wild type and mutant cells using genetically-directed sparse labeling.  
466 *Vision Research*, *51*(2), 269–279. doi: 10.1016/j.visres.2010.08.039
- 467 Bates, A. S., Janssens, J., Jefferis, G. S., & Aerts, S. (2019, June). Neuronal cell types in the fly: single-cell anatomy  
468 meets single-cell genomics. *Current Opinion in Neurobiology*, *56*, 125–134. Retrieved 2020-05-21, from [http://  
469 www.sciencedirect.com/science/article/pii/S095943881830254X](http://www.sciencedirect.com/science/article/pii/S095943881830254X) doi: 10.1016/j.conb.2018.12.012
- 470 Bates, A. S., Manton, J. D., Jagannathan, S. R., Costa, M., Schlegel, P., Rohlfing, T., & Jefferis, G. S. (2020, April).  
471 The natverse, a versatile toolbox for combining and analysing neuroanatomical data. *eLife*, *9*, e53350. Retrieved  
472 2020-05-21, from <https://doi.org/10.7554/eLife.53350> (Publisher: eLife Sciences Publications, Ltd) doi:  
473 10.7554/eLife.53350
- 474 Boor, C. d. (1978). *A Practical Guide to Splines*. New York: Springer-Verlag. Retrieved 2020-05-18, from  
475 <https://www.springer.com/gp/book/9780387953663>
- 476 Brakke, K. A. (2015). *The Motion of a Surface by Its Mean Curvature*. Princeton University Press.
- 477 Cao, F. (2003). *Geometric Curve Evolution and Image Processing*. Berlin Heidelberg: Springer-Verlag. Retrieved  
478 2020-05-20, from <https://www.springer.com/gp/book/9783540004028> doi: 10.1007/b10404
- 479 Chen, X. R., Heck, N., Lohof, A. M., Rochefort, C., Morel, M.-P., Wehrlé, R., ... Dusart, I. (2013, May). Mature  
480 Purkinje Cells Require the Retinoic Acid-Related Orphan Receptor- $\alpha$  (ROR $\alpha$ ) to Maintain Climbing Fiber Mono-  
481 Innervation and Other Adult Characteristics. *Journal of Neuroscience*, *33*(22), 9546–9562. Retrieved 2020-07-30,  
482 from <https://www.jneurosci.org/content/33/22/9546> doi: 10.1523/JNEUROSCI.2977-12.2013
- 483 Chédotal, A. (2014, October). Development and plasticity of commissural circuits: from locomotion to brain repair.  
484 *Trends in Neurosciences*, *37*(10), 551–562. doi: 10.1016/j.tins.2014.08.009

- 485 Costa, M., Manton, J. D., Ostrovsky, A. D., Prohaska, S., & Jefferis, G. S. X. E. (2016). NBLAST: Rapid, Sensitive  
486 Comparison of Neuronal Structure and Construction of Neuron Family Databases. *Neuron*, 91(2), 293–311. doi:  
487 10.1016/j.neuron.2016.06.012
- 488 Cuntz, H., Forstner, F., Borst, A., & Häusser, M. (2010, August). One Rule to Grow Them All: A General Theory of  
489 Neuronal Branching and Its Practical Application. *PLOS Computational Biology*, 6(8), e1000877. Retrieved 2020-  
490 05-21, from <https://journals.plos.org/ploscompbiol/article?id=10.1371/journal.pcbi.1000877>  
491 (Publisher: Public Library of Science) doi: 10.1371/journal.pcbi.1000877
- 492 Czesla, S., Molle, T., & Schmitt, J. H. M. M. (2018, January). A posteriori noise estimation in variable data sets - With  
493 applications to spectra and light curves. *Astronomy & Astrophysics*, 609, A39. doi: 10.1051/0004-6361/201730618
- 494 Digne, J., Morel, J.-M., Souzani, C.-M., & Lartigue, C. (2011). Scale Space Meshing of Raw Data Point Sets. *Computer  
495 Graphics Forum*, 30(6), 1630–1642. Retrieved 2020-05-20, from [https://onlinelibrary.wiley.com/doi/  
496 abs/10.1111/j.1467-8659.2011.01848.x](https://onlinelibrary.wiley.com/doi/abs/10.1111/j.1467-8659.2011.01848.x) (\_eprint: [https://onlinelibrary.wiley.com/doi/pdf/10.1111/j.1467-  
8659.2011.01848.x](https://onlinelibrary.wiley.com/doi/pdf/10.1111/j.1467-<br/>497 8659.2011.01848.x)) doi: 10.1111/j.1467-8659.2011.01848.x
- 498 Faure, E., Savy, T., Rizzi, B., Melani, C., Stašová, O., Fabrèges, D., ... others (2016). A workflow to process 3d+ time  
499 microscopy images of developing organisms and reconstruct their cell lineage. *Nature communications*, 7(1), 1–10.
- 500 Gage, M., & Hamilton, R. S. (1986). The heat equation shrinking convex plane curves. *Journal of Differential  
501 Geometry*, 23(1), 69–96. doi: 10.4310/jdg/1214439902
- 502 Gangatharan, G., Schneider-Maunoury, S., & Breaux, M. A. (2018). Role of mechanical cues in  
503 shaping neuronal morphology and connectivity. *Biology of the Cell*, 110(6), 125–136. Retrieved  
504 2020-05-21, from <https://onlinelibrary.wiley.com/doi/abs/10.1111/boc.201800003> (\_eprint:  
505 <https://onlinelibrary.wiley.com/doi/pdf/10.1111/boc.201800003>) doi: 10.1111/boc.201800003
- 506 Gerhard, S., Andrade, I., Fetter, R. D., Cardona, A., & Schneider-Mizell, C. M. (2017, October). Conserved neural  
507 circuit structure across Drosophila larval development revealed by comparative connectomics. *eLife*, 6, e29089.  
508 Retrieved 2020-05-21, from <https://doi.org/10.7554/eLife.29089> (Publisher: eLife Sciences Publications,  
509 Ltd) doi: 10.7554/eLife.29089
- 510 Gong, H., Zeng, S., Yan, C., Lv, X., Yang, Z., Xu, T., ... Luo, Q. (2013, July). Continuously tracing brain-  
511 wide long-distance axonal projections in mice at a one-micron voxel resolution. *NeuroImage*, 74, 87–98. doi:  
512 10.1016/j.neuroimage.2013.02.005
- 513 Grayson, M. A. (1987). The heat equation shrinks embedded plane curves to round points. *Journal of Differential  
514 Geometry*, 26(2), 285–314.
- 515 Helmstaedter, M., Briggman, K. L., Turaga, S. C., Jain, V., Seung, H. S., & Denk, W. (2013, August). Connectomic  
516 reconstruction of the inner plexiform layer in the mouse retina. *Nature*, 500(7461), 168–174. doi: 10.1038/  
517 nature12346
- 518 Horton, R. E. (1945, March). Erosional Development Of Streams And Their Drainage Basins; Hy-  
519 drophysical Approach To Quantitative Morphology. *GSA Bulletin*, 56(3), 275–370. Retrieved 2020-  
520 05-20, from [https://pubs.geoscienceworld.org/gsabulletin/article-abstract/56/3/275/4075/  
521 EROSIONAL-DEVELOPMENT-OF-STREAMS-AND-THEIR](https://pubs.geoscienceworld.org/gsabulletin/article-abstract/56/3/275/4075/EROSIONAL-DEVELOPMENT-OF-STREAMS-AND-THEIR) (Publisher: GeoScienceWorld) doi: 10.1130/0016  
522 -7606(1945)56[275:EDOSAT]2.0.CO;2
- 523 Januszewski, M., Kornfeld, J., Li, P. H., Pope, A., Blakely, T., Lindsey, L., ... Jain, V. (2018, August). High-precision  
524 automated reconstruction of neurons with flood-filling networks. *Nature Methods*, 15(8), 605–610. Retrieved  
525 2020-10-27, from <https://www.nature.com/articles/s41592-018-0049-4> (Number: 8 Publisher: Nature  
526 Publishing Group) doi: 10.1038/s41592-018-0049-4
- 527 Kasthuri, N., Hayworth, K. J., Berger, D. R., Schalek, R. L., Conchello, J. A., Knowles-Barley, S., ... Lichtman,  
528 J. W. (2015, July). Saturated Reconstruction of a Volume of Neocortex. *Cell*, 162(3), 648–661. Retrieved 2020-  
529 10-27, from [https://www.cell.com/cell/abstract/S0092-8674\(15\)00824-7](https://www.cell.com/cell/abstract/S0092-8674(15)00824-7) (Publisher: Elsevier) doi:  
530 10.1016/j.cell.2015.06.054
- 531 Keller-Peck, C. R., Walsh, M. K., Gan, W.-B., Feng, G., Sanes, J. R., & Lichtman, J. W. (2001). Asynchronous synapse  
532 elimination in neonatal motor units: studies using gfp transgenic mice. *Neuron*, 31(3), 381–394.

- 533 Kuan, A. T., Phelps, J. S., Thomas, L. A., Nguyen, T. M., Han, J., Chen, C.-L., ... others (2020). *Dense neuronal*  
534 *reconstruction through x-ray holographic nano-tomography* (Vol. 23; Tech. Rep.). Nature Publishing Group. doi:  
535 <https://doi.org/10.1038/s41593-020-0704-9>
- 536 Kunst, M., Laurell, E., Mokayes, N., Kramer, A., Kubo, F., Fernandes, A. M., ... Baier, H. (2019, July). A Cellular-  
537 Resolution Atlas of the Larval Zebrafish Brain. *Neuron*, 103(1), 21–38.e5. Retrieved 2020-05-18, from [http://](http://www.sciencedirect.com/science/article/pii/S0896627319303915)  
538 [www.sciencedirect.com/science/article/pii/S0896627319303915](http://www.sciencedirect.com/science/article/pii/S0896627319303915) doi: 10.1016/j.neuron.2019.04.034
- 539 Li, R., Zhu, M., Li, J., Bienkowski, M. S., Foster, N. N., Xu, H., ... Dong, H.-W. (2019, April). Precise segmentation  
540 of densely interweaving neuron clusters using G-Cut. *Nature Communications*, 10(1), 1549. Retrieved 2020-05-18,  
541 from <https://www.nature.com/articles/s41467-019-09515-0> doi: 10.1038/s41467-019-09515-0
- 542 Lichtman, J. W., & Colman, H. (2000, February). Synapse Elimination and Indelible Memory. *Neuron*, 25(2),  
543 269–278. Retrieved 2020-10-28, from [https://www.cell.com/neuron/abstract/S0896-6273\(00\)80893-4](https://www.cell.com/neuron/abstract/S0896-6273(00)80893-4)  
544 (Publisher: Elsevier) doi: 10.1016/S0896-6273(00)80893-4
- 545 Lindeberg, T. (1990, March). Scale-space for discrete signals. *IEEE Trans. PAMI*, 12(3), 234–254.
- 546 Lowery, L. A., & Van Vactor, D. (2009, May). The trip of the tip: understanding the growth cone machinery. *Nature*  
547 *reviews. Molecular cell biology*, 10(5), 332–343. Retrieved 2020-05-21, from [https://www.ncbi.nlm.nih.gov/](https://www.ncbi.nlm.nih.gov/pmc/articles/PMC2714171/)  
548 [pmc/articles/PMC2714171/](https://www.ncbi.nlm.nih.gov/pmc/articles/PMC2714171/) doi: 10.1038/nrm2679
- 549 Lu, J., Tapia, J. C., White, O. L., & Lichtman, J. W. (2009). The interscutularis muscle connectome. *PLoS Biol*, 7(2),  
550 e1000032.
- 551 Ma, X., Zhao, T., Wen, R., Wu, Z., & Wang, Q. (2017, May). Motion recognition based on concept learning. In *I2mtc*  
552 (pp. 1–6).
- 553 Mackworth, S., & Mokhtarian, F. (1988, June). The renormalized curvature scale space and the evolution properties  
554 of planar curves. In *Proceedings CVPR '88: The Computer Society Conference on Computer Vision and Pattern*  
555 *Recognition* (pp. 318–326). (ISSN: 1063-6919) doi: 10.1109/CVPR.1988.196255
- 556 Magliaro, C., Callara, A. L., Vanello, N., & Ahluwalia, A. (2019, August). Gotta Trace ‘em All: A Mini-Review on  
557 Tools and Procedures for Segmenting Single Neurons Toward Deciphering the Structural Connectome. *Frontiers*  
558 *in Bioengineering and Biotechnology*, 7. Retrieved 2020-05-21, from [https://www.ncbi.nlm.nih.gov/pmc/](https://www.ncbi.nlm.nih.gov/pmc/articles/PMC6727034/)  
559 [articles/PMC6727034/](https://www.ncbi.nlm.nih.gov/pmc/articles/PMC6727034/) doi: 10.3389/fbioe.2019.00202
- 560 Meinertzhagen, I. A. (2018, May). Of what use is connectomics? A personal perspective on the *Drosophila*  
561 connectome. *Journal of Experimental Biology*, 221(10). Retrieved 2020-05-21, from [https://jeb.biologists](https://jeb.biologists.org/content/221/10/jeb164954)  
562 [.org/content/221/10/jeb164954](https://jeb.biologists.org/content/221/10/jeb164954) (Publisher: The Company of Biologists Ltd Section: COMMENTARY) doi:  
563 10.1242/jeb.164954
- 564 Mihaljević, B., Larrañaga, P., Benavides-Piccione, R., Hill, S., DeFelipe, J., & Bielza, C. (2018, December). Towards  
565 a supervised classification of neocortical interneuron morphologies. *BMC Bioinformatics*, 19(1), 511. Retrieved  
566 2020-05-21, from <https://doi.org/10.1186/s12859-018-2470-1> doi: 10.1186/s12859-018-2470-1
- 567 Miyasaka, N., Arganda-Carreras, I., Wakisaka, N., Masuda, M., Sümbül, U., Seung, H. S., & Yoshihara, Y. (2014,  
568 April). Olfactory projectome in the zebrafish forebrain revealed by genetic single-neuron labelling. *Nature Communi-*  
569 *cations*, 5(1), 3639. Retrieved 2020-05-20, from <https://www.nature.com/articles/ncomms4639> (Number:  
570 1 Publisher: Nature Publishing Group) doi: 10.1038/ncomms4639
- 571 Mokhtarian, F. (1988, June). Multi-scale description of space curves and three-dimensional objects. In *CVPR* (pp.  
572 298–303).
- 573 Motta, A., Berning, M., Boergens, K. M., Staffler, B., Beining, M., Loomba, S., ... Helmstaedter, M. (2019, November).  
574 Dense connectomic reconstruction in layer 4 of the somatosensory cortex. *Science*, 366(6469). Retrieved 2020-10-27,  
575 from <https://science.sciencemag.org/content/366/6469/eaay3134> (Publisher: American Association  
576 for the Advancement of Science Section: Research Article) doi: 10.1126/science.aay3134
- 577 Muñoz-Castañeda, R., Zingg, B., Matho, K. S., Wang, Q., Chen, X., Foster, N. N., ... Dong, H.-W. (2020). Cellular  
578 anatomy of the mouse primary motor cortex. *bioRxiv*. Retrieved from [https://www.biorxiv.org/content/](https://www.biorxiv.org/content/early/2020/10/02/2020.10.02.323154)  
579 [early/2020/10/02/2020.10.02.323154](https://www.biorxiv.org/content/early/2020/10/02/2020.10.02.323154) doi: 10.1101/2020.10.02.323154
- 580 Petilla Interneuron Nomenclature Group, Ascoli, G. A., Alonso-Nanclares, L., Anderson, S. A., Barrionuevo, G.,  
581 Benavides-Piccione, R., ... Yuste, R. (2008, July). Petilla terminology: nomenclature of features of GABAergic  
582 interneurons of the cerebral cortex. *Nature Reviews. Neuroscience*, 9(7), 557–568. doi: 10.1038/nrn2402

- 583 Phan, M.-S., & Chessel, A. (2020). Genepy3d: a quantitative geometry python toolbox for large scale bioimaging  
584 [version 1; peer review: awaiting peer review]. *F1000Research*, 9(1374). doi: 10.12688/f1000research.27395.1
- 585 Radojević, M., & Meijering, E. (2019, July). Automated Neuron Reconstruction from 3D Fluorescence Microscopy  
586 Images Using Sequential Monte Carlo Estimation. *Neuroinformatics*, 17(3), 423–442. Retrieved 2020-10-27, from  
587 <https://doi.org/10.1007/s12021-018-9407-8> doi: 10.1007/s12021-018-9407-8
- 588 Riccomagno, M. M., & Kolodkin, A. L. (2015). Sculpting neural circuits by axon and dendrite pruning. *Annual review*  
589 *of cell and developmental biology*, 31, 779–805.
- 590 Rijsbergen, C. J. V. (1979). *Information Retrieval* (2nd ed.). USA: Butterworth-Heinemann.
- 591 Santos, R. A., Fuertes, A. J. C., Short, G., Donohue, K. C., Shao, H., Quintanilla, J., ... Cohen-Cory, S. (2018).  
592 DSCAM differentially modulates pre- and postsynaptic structural and functional central connectivity during visual  
593 system wiring. *Neural Development*, 13(1), 22. doi: 10.1186/s13064-018-0118-5
- 594 Sapiro, G. (2006). *Geometric Partial Differential Equations and Image Analysis* (1st ed.). Cambridge: Cambridge  
595 University Press.
- 596 Schneider-Mizell, C. M., Gerhard, S., Longair, M., Kazimiers, T., Li, F., Zwart, M. F., ... Cardona, A. (2016, March).  
597 Quantitative neuroanatomy for connectomics in Drosophila. *eLife*, 5, e12059. Retrieved 2020-05-21, from [https://](https://doi.org/10.7554/eLife.12059)  
598 [doi.org/10.7554/eLife.12059](https://doi.org/10.7554/eLife.12059) (Publisher: eLife Sciences Publications, Ltd) doi: 10.7554/eLife.12059
- 599 Shen, H., Tazuin, L. J., Baiyasi, R., Wang, W., Moringo, N., Shuang, B., & Landes, C. F. (2017). Single particle  
600 tracking: from theory to biophysical applications. *Chemical reviews*, 117(11), 7331–7376.
- 601 Uhlenbeck, G. E., & Ornstein, L. S. (1930, September). On the Theory of the Brownian Motion. *Physical Review*,  
602 36(5), 823–841. Retrieved 2020-05-18, from <https://link.aps.org/doi/10.1103/PhysRev.36.823> doi:  
603 10.1103/PhysRev.36.823
- 604 Volpe, G., Gigan, S., & Volpe, G. (2014, June). Simulation of the active Brownian motion of a microswimmer.  
605 *American Journal of Physics*, 82(7), 659–664.
- 606 Wang, X., Tucciarone, J., Jiang, S., Yin, F., Wang, B.-S., Wang, D., ... Huang, Z. J. (2019, March). Genetic Single  
607 Neuron Anatomy Reveals Fine Granularity of Cortical Axo-Axonic Cells. *Cell Reports*, 26(11), 3145–3159.e5.  
608 Retrieved 2020-08-03, from <http://www.sciencedirect.com/science/article/pii/S2211124719302116>  
609 doi: 10.1016/j.celrep.2019.02.040
- 610 Winnubst, J., Bas, E., Ferreira, T. A., Wu, Z., Economo, M. N., Edson, P., ... Chandrashekar, J. (2019). Reconstruction  
611 of 1,000 Projection Neurons Reveals New Cell Types and Organization of Long-Range Connectivity in the Mouse  
612 Brain. *Cell*, 179(1), 268–281.e13. doi: 10.1016/j.cell.2019.07.042
- 613 Witkin, A. P. (1983). Scale-space Filtering. In (pp. 1019–1022). San Francisco, CA, USA: Morgan Kaufmann  
614 Publishers Inc.
- 615 Xu, C. S., Januszewski, M., Lu, Z., Takemura, S.-y., Hayworth, K. J., Huang, G., ... Plaza, S. M. (2020, January).  
616 A Connectome of the Adult Drosophila Central Brain. *bioRxiv*, 2020.01.21.911859. Retrieved 2020-10-27,  
617 from <https://www.biorxiv.org/content/10.1101/2020.01.21.911859v1> (Publisher: Cold Spring Harbor  
618 Laboratory Section: New Results) doi: 10.1101/2020.01.21.911859
- 619 Yang, J., Yuan, J., & Li, Y. (2016, July). Parsing 3d motion trajectory for gesture recognition. *Journal of Visual*  
620 *Communication and Image Representation*, 38, 627–640. doi: 10.1016/j.jvcir.2016.04.010
